# Supplementary material
Source: PubMed Central journal article supplement (PMC5308220)

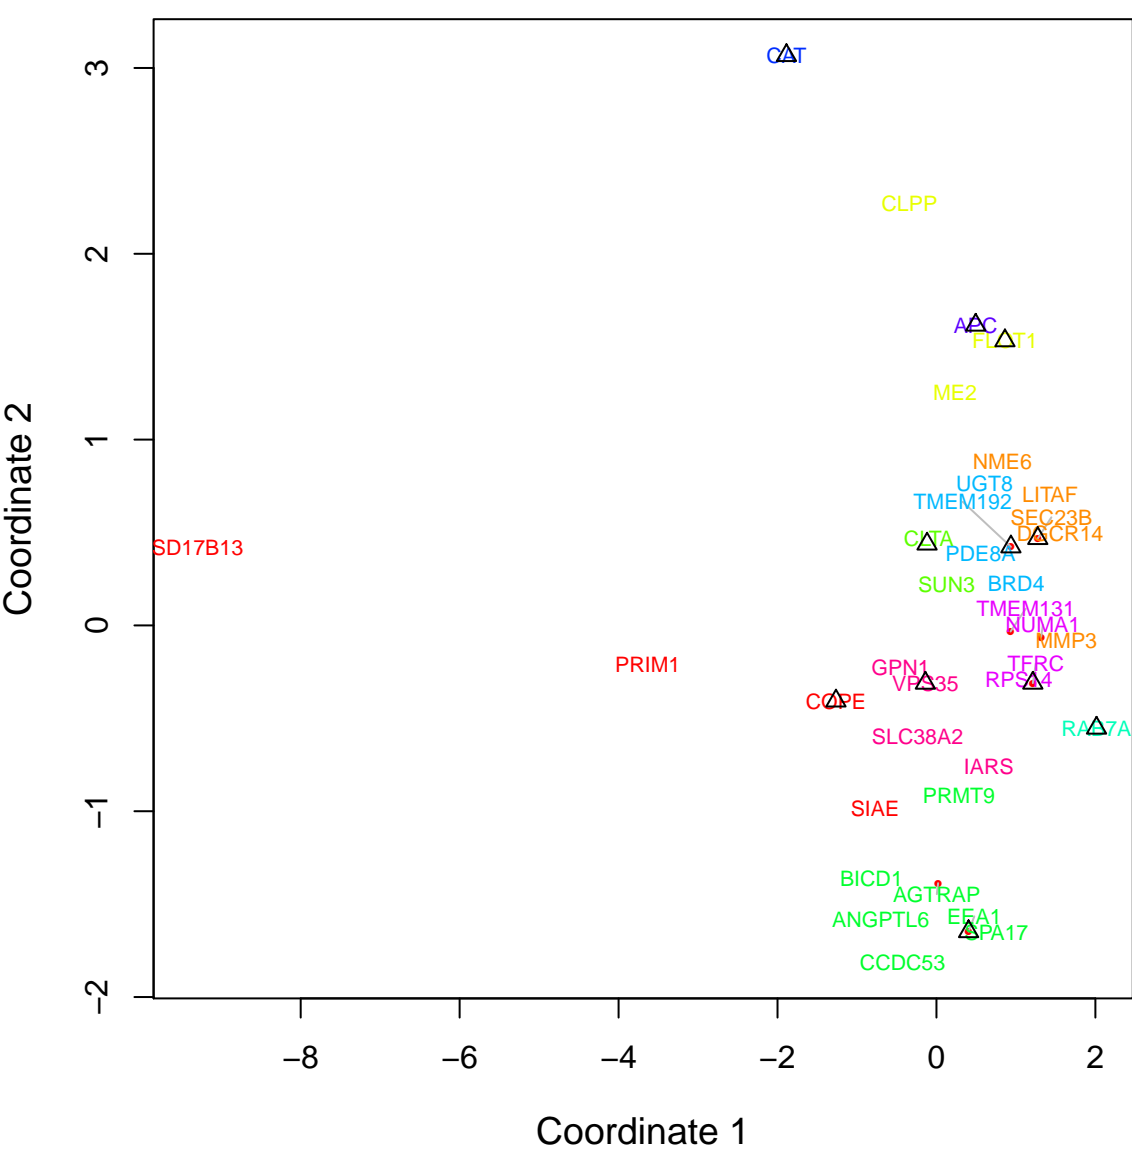

Supplement: NIHMS847685-supplement-SupFigure1.pdf [file NIHMS847685-supplement-SupFigure1.pdf]
